# Supplementary material for: MyoD Is a Novel Activator of Porcine FIT1 Gene by Interacting with the Canonical E-Box Element during Myogenesis
Source: PubMed Central journal article supplement (PMC4632787; doi:10.3390/ijms161025014), 2015-10-20
Supplement: ijms-16-25014-s001.pdf [file ijms-16-25014-s001.pdf]

## Supplementary Information

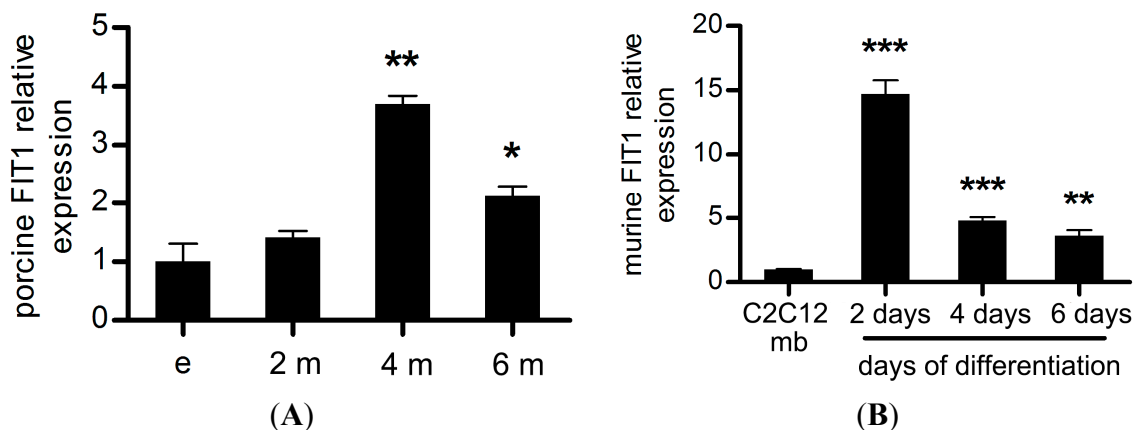

**Figure S1.** FIT1 mRNA expression profiles during development of the longissimus dorsi muscle in Large White pigs (A) and over the differentiation of C2C12 myoblasts (B). The relative expression (means  $\pm$  SD,  $n = 3$ ) was normalized to the level of the embryonic stage (A) and of the non-differentiated C2C12 myoblast cultures (B) with HPRT as the internal control, respectively. \*  $p < 0.05$ ; \*\*  $p < 0.01$ ; \*\*\*  $p < 0.001$  by ANOVA. e, embryonic stage; 2 m, 2 months of age; 4 m, 4 months of age; 6 m, 6 months of age; mb, myoblast.

**Table S1.** Primers used in plasmid construction and qRT-PCR.

| Primer                | Sequence (5'→3')             |
|-----------------------|------------------------------|
| pGL3-FIT1(-1037/+3)-F | CGACGCGTGGAGTGGGATGGATGG     |
| pGL3-FIT1(-875/+3)-F  | CGACGCGTTGGGTCACCATGCTGT     |
| pGL3-FIT1(-573/+3)-F  | CGACGCGTTCGGCATTCTCACCCT     |
| pGL3-FIT1(-397/+3)-F  | CGACGCGTGGTGAGGTGGGGATGA     |
| pGL3-FIT1(-123/+3)-F  | CGACGCGTGCCAACACAGCTCTGC     |
| pGL3-FIT1-R(3')       | GGAAGATCTCATGTTCCCTCCCCTC    |
| pGL3-mut(-870/-245)-F | GGGGTACCCACCATGCTGTACAGT     |
| pGL3-mut(-384/-245)-F | GGGGTACCTGACTTTGACCAAACAGG   |
| pGL3-FIT1-mut-R(3')   | GAAGATCTGTATCCTTCCCTCAGTCC   |
| qPCR-FIT1-F(pig)      | CAACCCTCGGACCAT              |
| qPCR-FIT1-R(pig)      | GTAGCCAGGAACACCA             |
| qPCR-HPRT-F(pig)      | GGTCAAGCAGCATAATCCAAAG       |
| qPCR-HPRT-R(pig)      | CAAGGGCATAGCCTACCACAA        |
| qPCR-FIT1-F(mouse)    | CGATGAGTAGGAAGGCAC           |
| qPCR-FIT1-R(mouse)    | CACGGCAACTTCTTCAAC           |
| qPCR-HPRT-F(mouse)    | GCAAACCTTTGCTTTCCTGG         |
| qPCR-HPRT-R(mouse)    | GCTTTGTATTGGCTTTTCC          |
| siRNA of MyoD1-F      | CCAAUGCGAUUUUAUCAGGUGCUUUGTT |
| siRNA of MyoD1-R      | CAAAGCACCUGAUAAAUCGCAUUGGTT  |
| E1-F                  | GCCAACACAGCTCTGC             |
| E1-R                  | CATGTTCCCTCCCCTC             |
| E2-F                  | CTATGTCAGGACACACTTCCA        |
| E2-R                  | GGGCAGAGCGCTGTTG             |
| NC1-F                 | CCTCTGCCTTACTGTACTTTG        |

**Table S1. Cont.**

| <b>Primer</b> | <b>Sequence (5'→3')</b> |
|---------------|-------------------------|
| NC1-R         | GATGACCACTGCTGCCAA      |
| NC2-F         | TGGGTGCGGCAGTAGG        |
| NC2-R         | GCGCATTGAGCGGGAT        |
